# Supplementary material for: CsSWEET2, a Hexose Transporter from Cucumber (Cucumis sativus L.), Affects Sugar Metabolism and Improves Cold Tolerance in Arabidopsis
Source: MDPI journal article supplement (doi:10.3390/ijms23073886), 2022-03-31
Supplement: s1 [file s1]

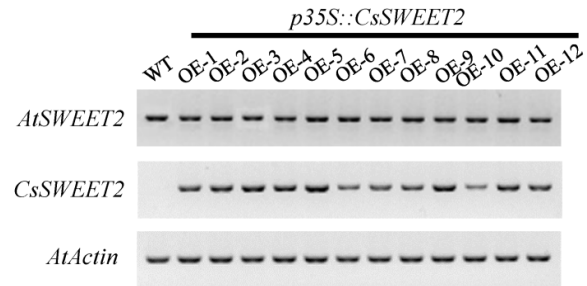

**Figure S3.** Reverse transcription PCR (RT-PCR) analysis of *CsSWEET2* and *AtSWEET2* expression in wild-type (WT) and transgenic Arabidopsis lines. The *CsSWEET2*-overexpressing (*CsSWEET2*-OE) lines, lines 5 and 9 (OE-5 and OE-9), which present much higher *CsSWEET2* transcript levels than the WT plants do and whose *AtSWEET2* expression is not affected, were selfed two times to generate homozygous lines.
