# Supplementary material for: CsSWEET2, a Hexose Transporter from Cucumber (Cucumis sativus L.), Affects Sugar Metabolism and Improves Cold Tolerance in Arabidopsis
Source: MDPI journal article supplement (doi:10.3390/ijms23073886), 2022-03-31
Supplement: s1 [file s1]

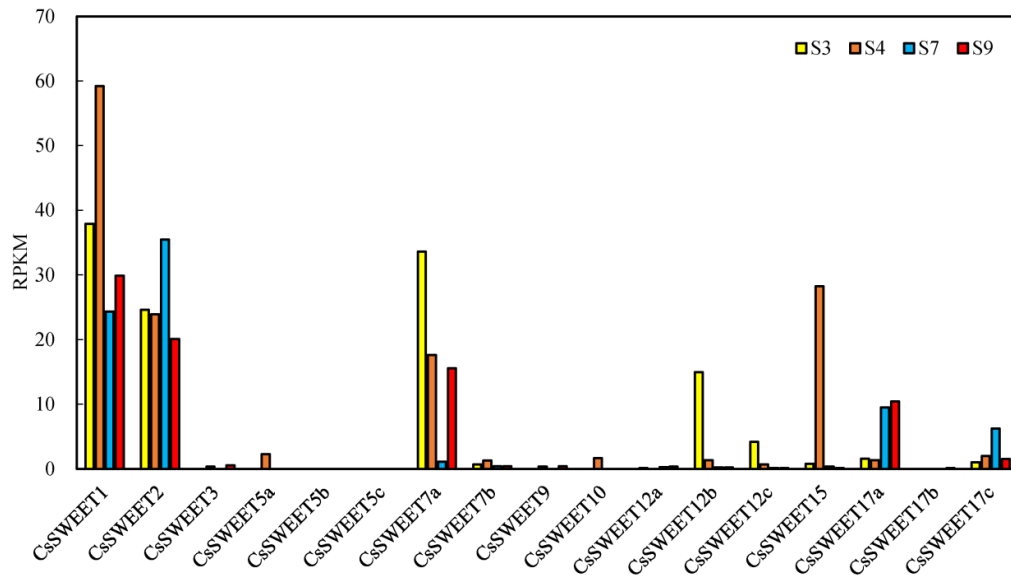

**Figure S4.** Expression analysis of 17 *CsSWEET* genes in different stages of cucumber leaves according to transcriptome data. Raw data were obtained from the Cucurbit Expression Atlas (<http://cucurbitgenomics.org/rnaseq/home>) under project PRJNA312872. The 17 cucumber *CsSWEET* genes were named according to their homologues in Arabidopsis and our earlier work [19]. RPKM, reads per kilobase per million mapped reads; S3, cotyledon of 4-week-old seedlings; S4, true leaf of 4-week-old seedlings; S7, young leaf of the second node from the top of cucumber plants; S9, mature leaf of the fifth node from the top of cucumber plants.
